# Supplementary material
Source: PubMed Central journal article supplement (PMC6185767)
Supplement: NIHMS978175-supplement-Supp_info.pdf [file NIHMS978175-supplement-Supp_info.pdf]

## Supplemental Information

Multi-species activity screening of microcin J25 mutants yields antimicrobials with increased specificity towards pathogenic *Salmonella* species relative to human commensal *Escherichia coli*

Seth C. Ritter, Mike L. Yang, Yiannis N. Kaznessis, Benjamin J. Hackel

Department of Chemical Engineering and Materials Science, University of Minnesota–Twin  
Cities, Minneapolis, Minnesota

## **Supplemental Data and Analysis**

### *Algorithm to measure zones of inhibition*

Sizes of zones of inhibition were measured using a custom MATLAB script (see attached code and example). This script works according to the following pseudocode:

1. Import image, downscale and apply a median smoothing to reduce noise
2. User selects starting pixel within the colony of the producing bacteria
3. Algorithm steps out to adjacent pixels, adding them to the set of colony pixels if their intensity is above some fraction (user defined, default to 0.95) of the average of added colony pixels.
4. Pixels which are surrounded by colony pixels are automatically added to the colony pixels and assumed to be image errors or inconsistency in growth region.
5. Algorithm then steps out from boundary of colony pixels to add zone of inhibition pixels, adding pixels below some user fraction of the average (default to 1.0).
6. Surrounded pixels are added as well
7. Program outputs the size of each zone in pixels

Below is an example output:

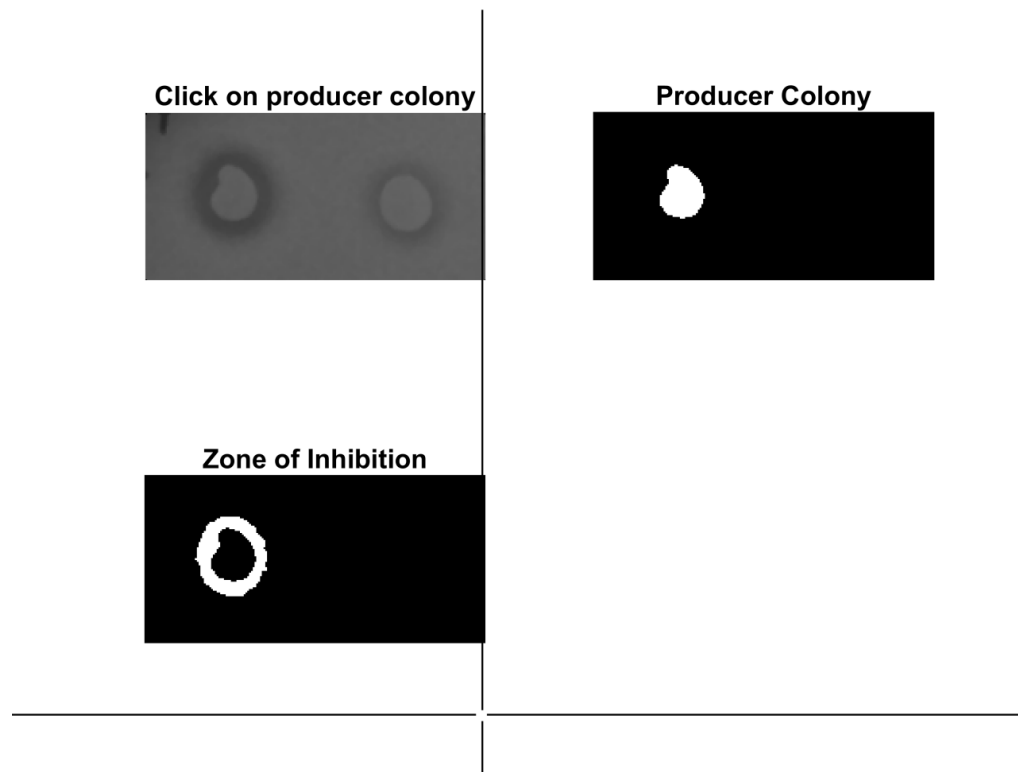

**Supplemental Figure 1.** Automated measuring of zones of inhibition

(Top-left) Imported and smoothed image taken by user showing two producer colonies surrounded by zones of inhibition as a result of antimicrobial production. (Top-right) Upon selection of the left producer colony, the algorithm generates the displayed producer colony (size = 531 pixels). (Bottom-left) The algorithm displays the zone of inhibition (size = 807 pixels).

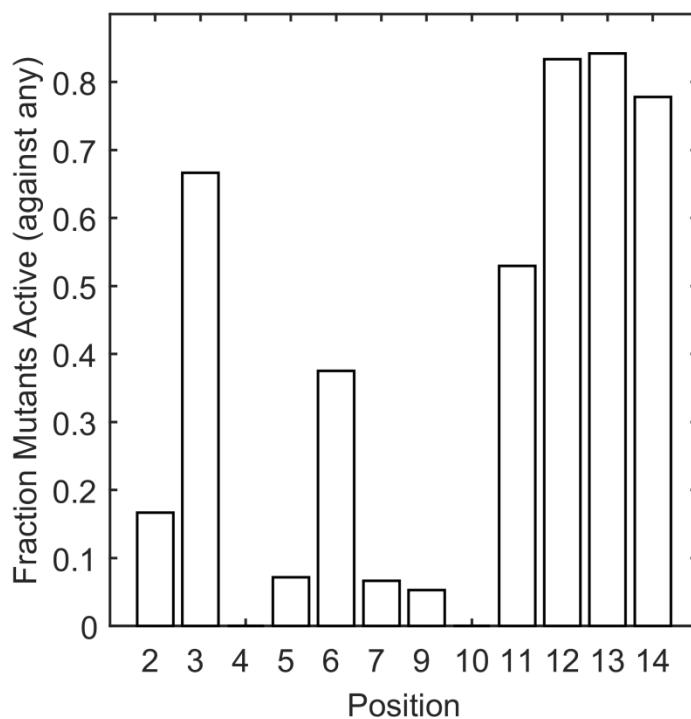

**Supplemental Figure 2.** Per-residue mutational tolerance.

Displayed are the fractions of sampled mutants ( $n = 14-18$  per site) which retained detectable activity against any of the four targets are presented. The analysis finds that loop positions 11-14 form the continuous set of residues with the highest mutational tolerance. Positions 7 and 9 are known to have a low tolerance for mutation. Pavlova et al showed that mutating positions 7 and 9 reduced RNAP inhibition.

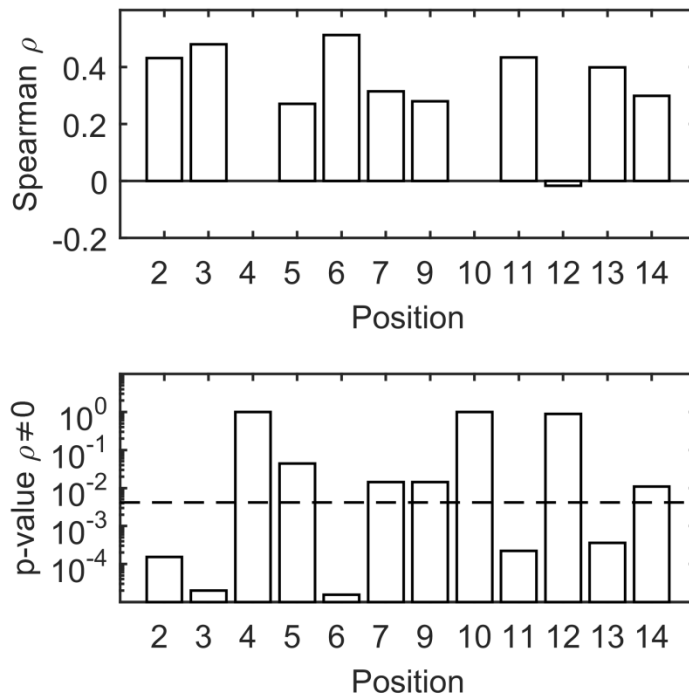

**Supplemental Figure 3.** Relationship between chemical homology and **MccJ25** mutant activity per residue.

Chemical homology, a global relationship of the tendencies of different amino acid substitutions at evolutionarily related sites, was assessed as a predictor of activity of **MccJ25** single-mutants. For each position the correlation between activities, against all four pathogenic targets of mutants sampled, and the BLOSUM 90 score associated with the (wild-type, mutant) pair was analyzed.

It is found that 5 of 12 positions tested show a significant Spearman's correlation ( $p < 0.05$ , Bonferroni corrected, dashed line bottom plot. Computed using exact permutation.). Position 2 shows a preference for small amino acids, G2[A,C,S]. Position 3 shows a preference for small amino acids, A3[G,C,S,T], but also supports many others. However, many mutations show differences between the different targets, implying that this interaction may serve to enable some specificity. Though position 5 showed conservation amongst mutations sampled, as well as supporting literature data (Lai and Kaznessis, 2017) (requiring charged residue), only 1 other mutation was tolerated and sampled (H5R), which was insufficient evidence for testing. Position 6 shows a preference for hydrophobic residues, V6[L,I,W,F].

Position 11 shows a preference for hydrophobic residues, V11[I,M,W]. Position 13 shows a small preference for hydrophobic residues, I13[F,W,Y,M,L,V,A], but also tolerates many hydrophilic mutations. Surprisingly, though positions 12 and 14 show a high tolerance for mutation, they don't show a relationship between the BLOSUM90 scores for mutants in reference to wild-type (Glycine). These data could be explained by the lack of a meaningful interaction between residues 12 and 14 of **MccJ25** and any proteins in the host involved in transport or activity.

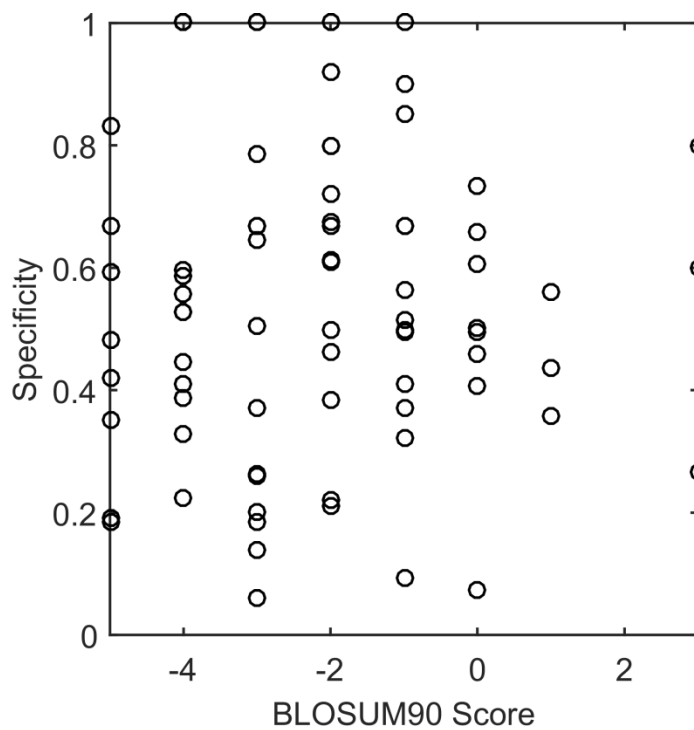

**Supplemental Figure 4.** Correlation between specificity and chemical homology

Similar to the analysis done in Supplemental Figure 2, the relationship between chemical homology and specificity for each single-mutant was assessed. There is insufficient evidence that chemical homology between wild type and mutant predict the specificity ( $p > 0.1$ ).

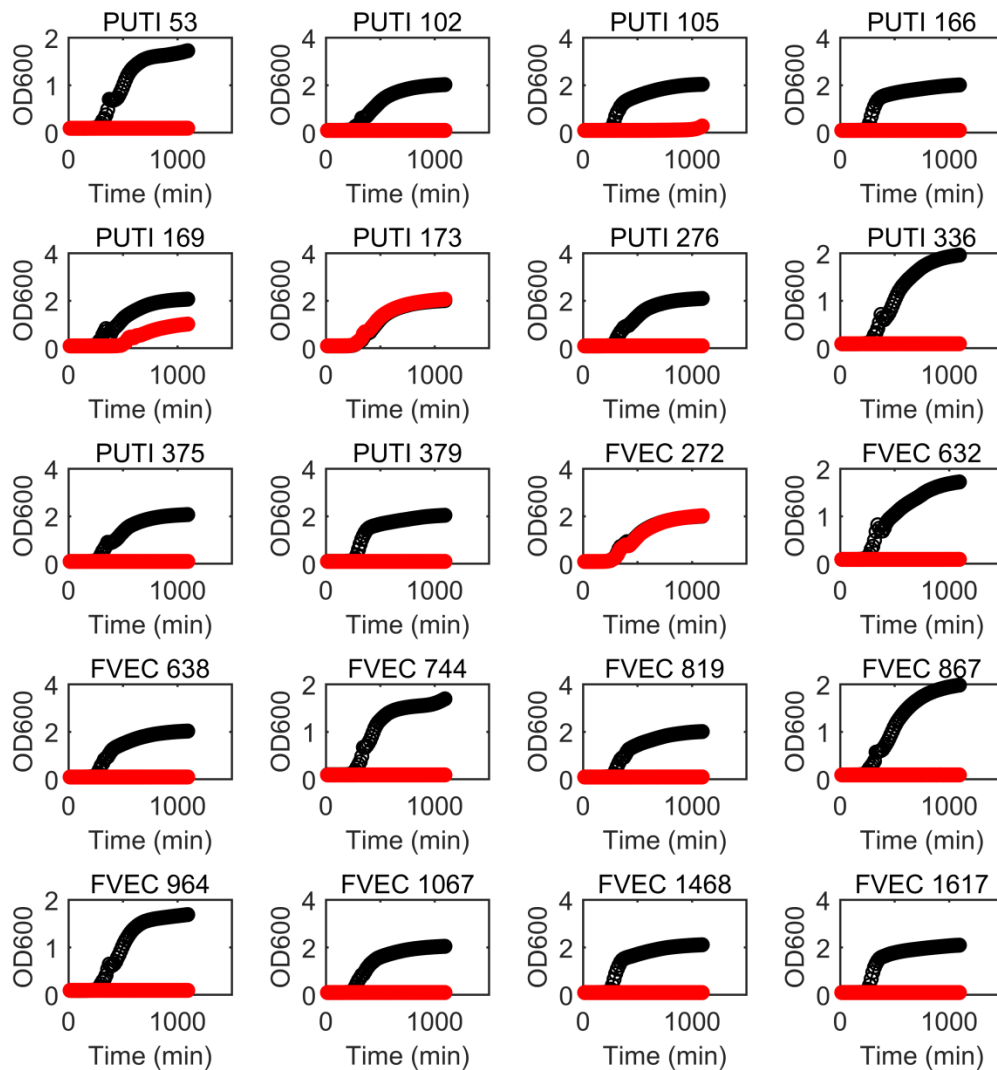

**Supplemental Figure 5.** Evaluation of commensal *E. coli* susceptibility to wild-type *MccJ25*

Commensal *E. coli* isolates were grown overnight to stationary phase in LB. The following day they were diluted 1000x in fresh LB supplemented to 20 vol% sterilized supernatant from a *MccJ25*-producing cell line. Their growth was then monitored at 37°C via optical density readings to observe the impact of *MccJ25*-containing supernatant on growth. Of the 20 isolates evaluated, 18 showed susceptibility to *MccJ25*. The above are averages of 2 replicates per isolate exposed to both *MccJ25* (red) and stop-codon mutated *MccJ25* (black) supernatant. PUTI 173 and FVEC 272 do not show susceptibility to *MccJ25*.



A

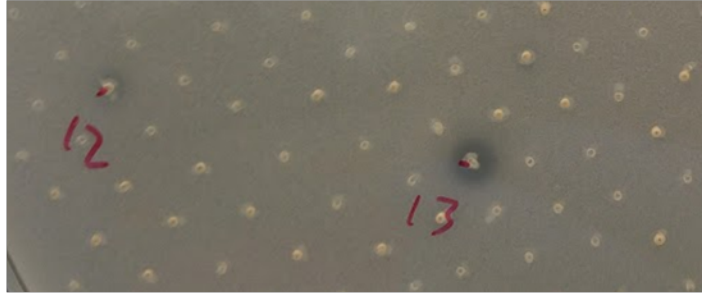

B

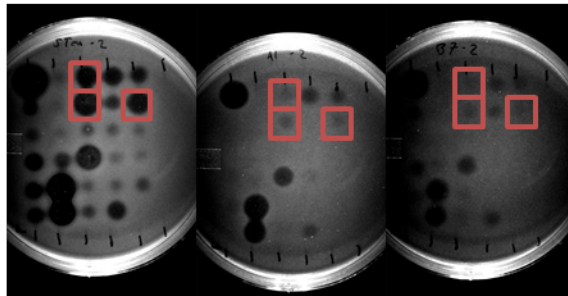

C

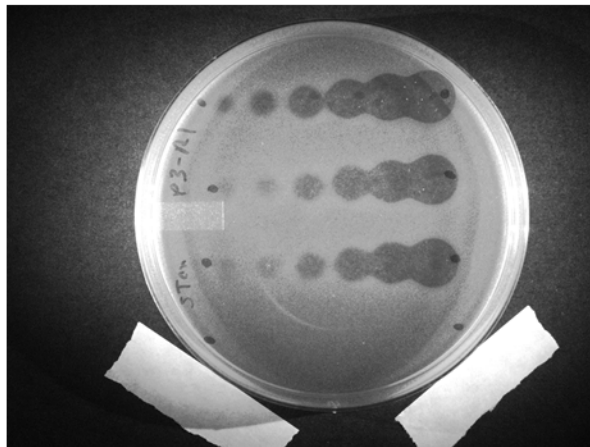

**Supplemental Figure 6.** Screening strategy for multi-mutant MccJ25 library

(A) Colonies of randomly-selected producers of mutants of MccJ25 were transferred to LB-agar plates seeded with SE and IPTG. Following outgrowth, colonies showing zones of inhibition were gathered. (B) Heat-sterilized supernatants produced from the 64 active colonies from (A) were assayed for activity

against pathogenic strains as well as human commensal *E. coli*. In the examples displayed, the orange boxes outline clones that were sequence-verified to be MccJ25<sup>113T</sup>. The differential response in activity between STen (left) and two human commensal *E. coli* strains (middle, right) can be seen. (C) Activities of supernatants of candidate producers showing promising specificity modulation in (B) were quantified via dilution-series against all pathogens and human commensal *E. coli*.

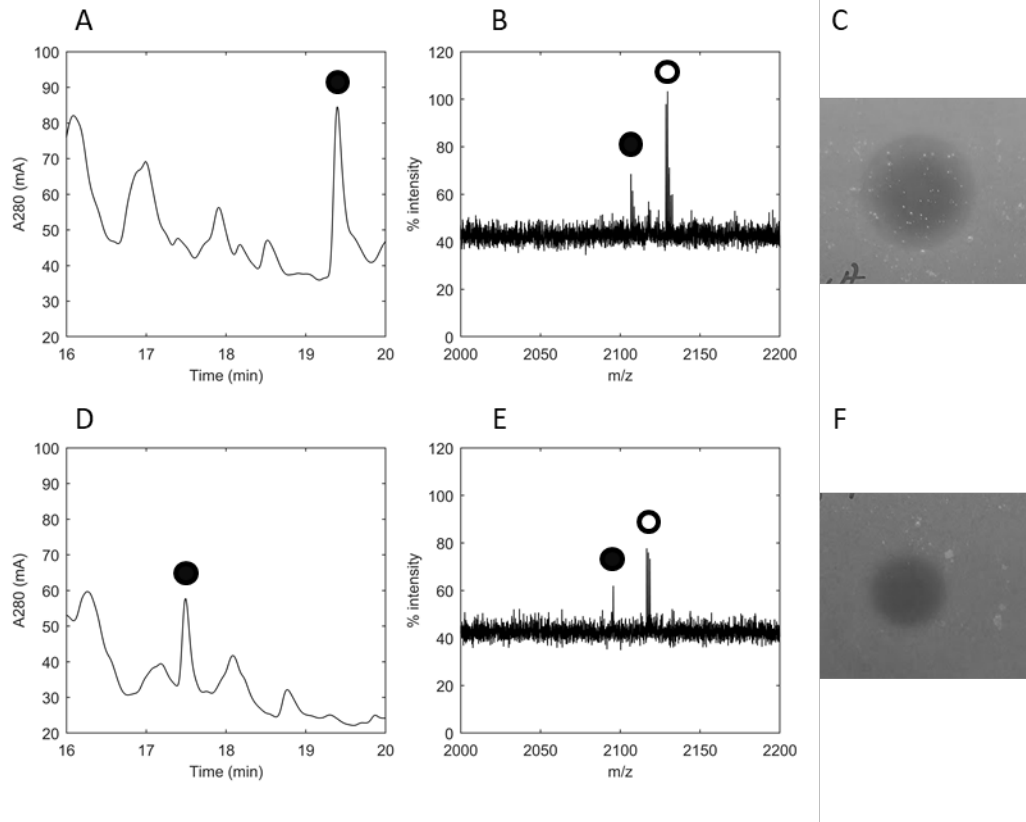

**Supplemental Figure 7.** Assessment of activity of purified MccJ25 and MccJ25<sup>I13T</sup>

MccJ25 (A-C) and MccJ25<sup>I13T</sup> (D-F) were purified from supernatant of expressing cells. Following a 2-volume n-butanol extraction, samples were dried and run on RP-HPLC (A, D). All peaks absorbing at 280 nm were collected and evaluated for activity. Only the indicated peaks (closed circles) displayed activity against the *Salmonella* indicator strain. To assess identity, active peaks were freeze-dried under vacuum, resuspended in ultrapure water and evaluated via matrix-assisted laser-desorption ionization mass spectrometry (B, E). The processed form (closed circle) and linear form (open circle) of MccJ25 and MccJ25<sup>I13T</sup> were identified. Previous efforts in the literature have demonstrated that the linear form is not active (Wilson et al., 2003). Water-solubilized purified peptides exhibited activity against *Salmonella* indicator strain in an agar plate assay analogous to Figure 4 (C, F).

**Supplemental Table I. Bacteria and plasmids used**

| <b>Bacterial Strain or Plasmid</b>             | <b>Description</b>                                                                               | <b>Reference or Source</b>                                                  |
|------------------------------------------------|--------------------------------------------------------------------------------------------------|-----------------------------------------------------------------------------|
| <b>Producer</b>                                |                                                                                                  |                                                                             |
| NEB Express I <sup>q</sup>                     | BL21 derivative, no antimicrobial peptides, overexpresses LacI                                   | New England Biolabs                                                         |
| <b>Pathogenic Targets</b>                      |                                                                                                  |                                                                             |
| <i>Salmonella enterica</i> serovar Enteritidis | #MH9189                                                                                          | Timothy Johnson, Veterinary and Biological Science, University of Minnesota |
| <i>Salmonella enterica</i> serovar Tennessee   | #ST101                                                                                           | Timothy Johnson, Veterinary and Biological Science, University of Minnesota |
| <i>Escherichia coli</i> JJ1887                 | Urinary tract infection causing                                                                  | J. Johnson, Veterans Affairs Hospital, Minneapolis, MN                      |
| <i>Escherichia coli</i> O157:H7                | #2026                                                                                            | Michael Sadowsky, Biotechnology Institute, University of Minnesota          |
| <b>Commensal Targets</b>                       |                                                                                                  |                                                                             |
| <i>Escherichia coli</i> PUTI 53                | Human isolate. Sourced sample type: Urine                                                        | J. Johnson, Veterans Affairs Hospital, Minneapolis, MN                      |
| <i>Escherichia coli</i> PUTI 102               | Human isolate. Sourced sample type: Urine                                                        | J. Johnson, Veterans Affairs Hospital, Minneapolis, MN                      |
| <i>Escherichia coli</i> PUTI 105               | Human isolate. Sourced sample type: Urine                                                        | J. Johnson, Veterans Affairs Hospital, Minneapolis, MN                      |
| <i>Escherichia coli</i> PUTI 166               | Human isolate. Sourced sample type: Urine                                                        | J. Johnson, Veterans Affairs Hospital, Minneapolis, MN                      |
| <i>Escherichia coli</i> PUTI 169               | Human isolate. Sourced sample type: Urine                                                        | J. Johnson, Veterans Affairs Hospital, Minneapolis, MN                      |
| <i>Escherichia coli</i> PUTI 173               | Human isolate. Sourced sample type: Urine                                                        | J. Johnson, Veterans Affairs Hospital, Minneapolis, MN                      |
| <i>Escherichia coli</i> PUTI 276               | Human isolate. Sourced sample type: Urine                                                        | J. Johnson, Veterans Affairs Hospital, Minneapolis, MN                      |
| <i>Escherichia coli</i> PUTI 336               | Human isolate. Sourced sample type: Fecal                                                        | J. Johnson, Veterans Affairs Hospital, Minneapolis, MN                      |
| <i>Escherichia coli</i> PUTI 375               | Human isolate. Sourced sample type: Fecal                                                        | J. Johnson, Veterans Affairs Hospital, Minneapolis, MN                      |
| <i>Escherichia coli</i> PUTI 379               | Human isolate. Sourced sample type: Fecal                                                        | J. Johnson, Veterans Affairs Hospital, Minneapolis, MN                      |
| <i>Escherichia coli</i> FVEC 272               | Human isolate. Sourced sample type: Fecal                                                        | J. Johnson, Veterans Affairs Hospital, Minneapolis, MN                      |
| <i>Escherichia coli</i> FVEC 632               | Human isolate. Sourced sample type: Fecal                                                        | J. Johnson, Veterans Affairs Hospital, Minneapolis, MN                      |
| <i>Escherichia coli</i> FVEC 638               | Human isolate. Sourced sample type: Fecal                                                        | J. Johnson, Veterans Affairs Hospital, Minneapolis, MN                      |
| <i>Escherichia coli</i> FVEC 744               | Human isolate. Sourced sample type: Fecal                                                        | J. Johnson, Veterans Affairs Hospital, Minneapolis, MN                      |
| <i>Escherichia coli</i> FVEC 819               | Human isolate. Sourced sample type: Fecal                                                        | J. Johnson, Veterans Affairs Hospital, Minneapolis, MN                      |
| <i>Escherichia coli</i> FVEC 867               | Human isolate. Sourced sample type: Fecal                                                        | J. Johnson, Veterans Affairs Hospital, Minneapolis, MN                      |
| <i>Escherichia coli</i> FVEC 964               | Human isolate. Sourced sample type: Fecal                                                        | J. Johnson, Veterans Affairs Hospital, Minneapolis, MN                      |
| <i>Escherichia coli</i> FVEC 1067              | Human isolate. Sourced sample type: Fecal                                                        | J. Johnson, Veterans Affairs Hospital, Minneapolis, MN                      |
| <i>Escherichia coli</i> FVEC 1468              | Human isolate. Sourced sample type: Fecal                                                        | J. Johnson, Veterans Affairs Hospital, Minneapolis, MN                      |
| <i>Escherichia coli</i> FVEC 1617              | Human isolate. Sourced sample type: Fecal                                                        | J. Johnson, Veterans Affairs Hospital, Minneapolis, MN                      |
| <b>Plasmid</b>                                 |                                                                                                  |                                                                             |
| pJP3                                           | Microcin J25 expression cassette containing plamid. McjA under Laco/T5 for controlled induction. | Link group, Princeton (Pan et al., 2010)                                    |
| pJP4                                           | pJP3 variant with XhoI moved downstream and optimized ribosomal binding site                     | This work                                                                   |

**Supplemental Table II. Sequences for genes and oligonucleotides used**

|                                    |                                                                                                                                                                                                                                                                                                                                  |
|------------------------------------|----------------------------------------------------------------------------------------------------------------------------------------------------------------------------------------------------------------------------------------------------------------------------------------------------------------------------------|
| pJP4                               |                                                                                                                                                                                                                                                                                                                                  |
| Modified mcjA expression cassette  | CCCTTTTCGTCTTACCTCGATCGATCATAAAAAATTTATTGCTTTGTGAGCGGATAACAATTATAAATACTCGAGGCGCC<br>AGTCTCCCATTAAGGAGGTTAACATACATGATCAAAACATTTTCACTTCAACAAACTGTCAAGCGGTAAGAAGAATAATGT<br>TCCGAGCCACAGAAAGGAGTGATTCAGATTAAGAAGAGCGCTCGCAATTAACGAAGGGCGGTGCTGGTCATGTCCTTG<br>AATATTCGTGGGCATCGGGACCCCAATCTCCTTCTATGGGTAAAAGCTTAATTAGCTGAGCTTGGACTC |
| Single-site saturation mutagenesis |                                                                                                                                                                                                                                                                                                                                  |
| mcjA <sub>FWD1</sub>               | AATTCTCGAGGCGCCAGTCTCCCATTAAGGAGGTTAACATACATGATCAAAACATTTTTCAC                                                                                                                                                                                                                                                                   |
| mcjA <sub>FWD2</sub>               | TACATGATCAAAACATTTTCACTTCAACAAACTGTCAAGCGGTAAGAAGAATAATGTTCCG                                                                                                                                                                                                                                                                    |
| mcjA <sub>FWD3</sub>               | GTAAGAAGAATAATGTTCCGAGCCAGCAAAGGGAGTGATTCAGATTAAGAAGAGCGCT                                                                                                                                                                                                                                                                       |
| mcjA <sub>FWD4</sub>               | TCAGATTAAGAAGAGCGCTCGCAATTAACGAAG                                                                                                                                                                                                                                                                                                |
| mcjA <sub>FWD4</sub> lib 3' set1   | GAATATTTCTGGGTCATCGGACCCCAATCTCCTTCTATGGGTAAAAGCTTAGCCGACCG                                                                                                                                                                                                                                                                      |
| mcjA <sub>FWD4</sub> lib 5' set2   | GCGCCTCGCAATTAACGAAGGGCGGTGCTGGTCATGTCCC                                                                                                                                                                                                                                                                                         |
| mcjA <sub>FWD4</sub> lib 3' set2   | ACCCCAATCTCCTTCTATGGGTAAAAGCTTAGCCGACCG                                                                                                                                                                                                                                                                                          |
| mcjA <sub>FWD4</sub> lib 5' set3   | GGCGGTGCTGGTCATGTCCCCTGAATATTTCTGGGTCATCG                                                                                                                                                                                                                                                                                        |
| mcjA <sub>FWD</sub> lib 5' lib2    | GCGCCTCGCAATTAACGAAGGGCCTNNKGTGGTCATGTCCCCTGAATATTTCTGGGTCATCG                                                                                                                                                                                                                                                                   |
| mcjA <sub>FWD</sub> lib 5' lib3    | GCGCCTCGCAATTAACGAAGGGCGTNNKGTGGTCATGTCCCCTGAATATTTCTGGGTCATCG                                                                                                                                                                                                                                                                   |
| mcjA <sub>FWD</sub> lib 5' lib4    | GCGCCTCGCAATTAACGAAGGGCGGTCTNNKCATGTCCCCTGAATATTTCTGGGTCATCG                                                                                                                                                                                                                                                                     |
| mcjA <sub>FWD</sub> lib 5' lib5    | GCGCCTCGCAATTAACGAAGGGCGGTGCTGGTNNKGTCCCCTGAATATTTCTGGGTCATCG                                                                                                                                                                                                                                                                    |
| mcjA <sub>FWD</sub> lib 5' lib6    | GCGCCTCGCAATTAACGAAGGGCGGTGGTCATNNKCTGAATATTTCTGGGTCATCG                                                                                                                                                                                                                                                                         |
| mcjA <sub>FWD</sub> lib 5' lib7    | GCGCCTCGCAATTAACGAAGGGCGGTGGTCATGTNNKGAATATTTCTGGGTCATCG                                                                                                                                                                                                                                                                         |
| mcjA <sub>FWD</sub> lib 5' lib9    | GGCGGTGCTGGTCATGTCCCCTGAANNKTTCTGGGTCATCGGGACCCCAATCTCCTTCTAT                                                                                                                                                                                                                                                                    |
| mcjA <sub>FWD</sub> lib 5' lib10   | GGCGGTGCTGGTCATGTCCCCTGAATATNNKGTGGGTCATCGGGACCCCAATCTCCTTCTAT                                                                                                                                                                                                                                                                   |
| mcjA <sub>FWD</sub> lib 5' lib11   | GGCGGTGCTGGTCATGTCCCCTGAATATTTNNKGGTCATCGGGACCCCAATCTCCTTCTAT                                                                                                                                                                                                                                                                    |
| mcjA <sub>FWD</sub> lib 5' lib12   | GGCGGTGCTGGTCATGTCCCCTGAATATTTCTGGNNKATCGGGACCCCAATCTCCTTCTAT                                                                                                                                                                                                                                                                    |
| mcjA <sub>FWD</sub> lib 5' lib13   | GGCGGTGCTGGTCATGTCCCCTGAATATTTCTGGGNNKGGGACCCCAATCTCCTTCTAT                                                                                                                                                                                                                                                                      |
| mcjA <sub>FWD</sub> lib 5' lib14   | GGCGGTGCTGGTCATGTCCCCTGAATATTTCTGGGTCATNNKACCCCAATCTCCTTCTAT                                                                                                                                                                                                                                                                     |
| REV amplify 10_03_16               | CGGTCGGCTAAGCTTTTA                                                                                                                                                                                                                                                                                                               |
| Multi-site saturation mutagenesis  |                                                                                                                                                                                                                                                                                                                                  |
| Lib3s1 Lib13s1                     | CCTCGCAATTAACGAAGGCRSCRMCGACACBTCCAGAATACTTCRTGGGATMCGSAACCCCAATCTCCTTCTATGG                                                                                                                                                                                                                                                     |
| Lib3s2 Lib13s1                     | CCTCGCAATTAACGAAGGCRSCATGGGACACBTCCAGAATACTTCRTGGGATMCGSAACCCCAATCTCCTTCTATGG                                                                                                                                                                                                                                                    |
| Lib3s1 Lib13s2                     | CCTCGCAATTAACGAAGGCRSCRMCGACACBTCCAGAATACTTCRTGGGAAYAGSAACCCCAATCTCCTTCTATGG                                                                                                                                                                                                                                                     |
| Lib3s2 Lib13s2                     | CCTCGCAATTAACGAAGGCRSCATGGGACACBTCCAGAATACTTCRTGGGAAYAGSAACCCCAATCTCCTTCTATGG                                                                                                                                                                                                                                                    |
| FWD1                               | TATAATACTCGAGGCGCCAGTCTCCCATTAAGGAGGTTAACATACATGATCAAAACATTTT                                                                                                                                                                                                                                                                    |
| FWD2                               | ACATACATGATCAAAACATTTTCACTTCAACAAACTGTCAAGCGGTAAGAAGAATAATGTT                                                                                                                                                                                                                                                                    |
| FWD3                               | GCGGTAAGAAGAATAATGTTCCGAGCCAGCAAAGGGAGTGATTCAGATTAAGAAGAGCG                                                                                                                                                                                                                                                                      |
| FWD4                               | GATTCAGATTAAGAAGAGCGCTCGCAATTAACGAAGGGC                                                                                                                                                                                                                                                                                          |
| REV                                | AGCTAATTAAGCTTTTACCATAGAAGGAGATTGGGGT                                                                                                                                                                                                                                                                                            |
| Next-generation Sequencing         |                                                                                                                                                                                                                                                                                                                                  |
| TSUA1                              | AATGATACGGGCGACCACCGAGATCTACACTCTTCCCTACACGACGCTCTTCCGATCT                                                                                                                                                                                                                                                                       |
| BarcodeR1                          | ACACGACGCTCTTCCGATCTTAGGCGCTCGCAATTAACGAAG                                                                                                                                                                                                                                                                                       |
| BarcodeR2                          | ACACGACGCTCTTCCGATCTATAGCGCTCGCAATTAACGAAG                                                                                                                                                                                                                                                                                       |
| BarcodeR3                          | ACACGACGCTCTTCCGATCTATAGCGCTCGCAATTAACGAAG                                                                                                                                                                                                                                                                                       |
| BarcodeR4                          | ACACGACGCTCTTCCGATCTTAGCGCTCGCAATTAACGAAG                                                                                                                                                                                                                                                                                        |
| BarcodeR5                          | ACACGACGCTCTTCCGATCTTACGGCGCTCGCAATTAACGAAG                                                                                                                                                                                                                                                                                      |
| BarcodeR6                          | ACACGACGCTCTTCCGATCTGCGTGCCTCGCAATTAACGAAG                                                                                                                                                                                                                                                                                       |
| BarcodeR7                          | ACACGACGCTCTTCCGATCTTGGCGCGCTCGCAATTAACGAAG                                                                                                                                                                                                                                                                                      |
| BarcodeR8                          | ACACGACGCTCTTCCGATCTGACTGCGCTCGCAATTAACGAAG                                                                                                                                                                                                                                                                                      |
| BarcodeC1                          | AGACGTGTGCTCTTCCGATCACCCTCAGCTAATTAAGCTTTTA                                                                                                                                                                                                                                                                                      |
| BarcodeC2                          | AGACGTGTGCTCTTCCGATCTGGTCTCAGCTAATTAAGCTTTTA                                                                                                                                                                                                                                                                                     |
| BarcodeC3                          | AGACGTGTGCTCTTCCGATCTTACTCAGCTAATTAAGCTTTTA                                                                                                                                                                                                                                                                                      |
| BarcodeC4                          | AGACGTGTGCTCTTCCGATCCTCAGCTAATTAAGCTTTTA                                                                                                                                                                                                                                                                                         |
| BarcodeC5                          | AGACGTGTGCTCTTCCGATCTACCTCAGCTAATTAAGCTTTTA                                                                                                                                                                                                                                                                                      |
| BarcodeC6                          | AGACGTGTGCTCTTCCGATCGGCACTCAGCTAATTAAGCTTTTA                                                                                                                                                                                                                                                                                     |
| BarcodeC7                          | AGACGTGTGCTCTTCCGATCAGTCTCAGCTAATTAAGCTTTTA                                                                                                                                                                                                                                                                                      |
| BarcodeC8                          | AGACGTGTGCTCTTCCGATCCAACCTCAGCTAATTAAGCTTTTA                                                                                                                                                                                                                                                                                     |
| BarcodeC9                          | AGACGTGTGCTCTTCCGATCTGCCTCAGCTAATTAAGCTTTTA                                                                                                                                                                                                                                                                                      |
| BarcodeC10                         | AGACGTGTGCTCTTCCGATCGAGTCTCAGCTAATTAAGCTTTTA                                                                                                                                                                                                                                                                                     |
| BarcodeC11                         | AGACGTGTGCTCTTCCGATCCGTGCTCAGCTAATTAAGCTTTTA                                                                                                                                                                                                                                                                                     |
| BarcodeC12                         | AGACGTGTGCTCTTCCGATCTTAACCTCAGCTAATTAAGCTTTTA                                                                                                                                                                                                                                                                                    |
| TSI3'                              | CAAGCAGAAGACGGCATACGAGATCGTATGTGACTGGAGTTCAGACGTGTGCTCTTCCG                                                                                                                                                                                                                                                                      |

**Supplemental Table III.** Codon usage and multi-mutant library activity

|          |            | Codon      |              | Codon Usage<br>(Nakamura et al., 1999) <sup>a</sup> |              | Activity vs SE |              |
|----------|------------|------------|--------------|-----------------------------------------------------|--------------|----------------|--------------|
| Position | Amino Acid | Singletons | Multi-mutant | Singletons                                          | Multi-mutant | Singletons     | Multi-mutant |
| 2        | T          | ACG        | ACC          | 8.5                                                 | 14.3         | 0              | 1            |
| 2        | S          | TCT        | AGC          | 21.2                                                | 15.9         | 0.8            | 0            |
| 2        | A          | GCG        | GCC          | 54.9                                                | 14.1         | 0.6            | 1            |
| 2        | G          | GGT        | GGC          | 14.3                                                | 14.3         | 1              | 1            |
| 3        | M          | ATG        | ATG          | 8.5                                                 | 8            | 0.6            | 1            |
| 3        | N          | AAT        | AAC          | 32.6                                                | 19.6         | 0.5            | 0            |
| 3        | T          | ACG        | ACC          | 14.6                                                | 25.2         | 0.7            | 1            |
| 3        | D          | GAT        | GAC          | 32.6                                                | 25.5         | 0              | 1            |
| 3        | A          | GCT        | GCC          | 24.4                                                | 33.1         | 1              | 1            |
| 6        | L          | CTG        | CTC          | 37.4                                                | 37.4         | 0.3            | 0            |
| 6        | V          | GTC        | GTC          | 14.6                                                | 25.2         | 1              | 0            |
| 6        | F          | TTT        | TTC          | 30                                                  | 15.1         | 0.5            | 1            |
| 11       | M          | ATG        | ATG          | 13.8                                                | 25.5         | 0.4            | 1            |
| 11       | V          | GTG        | GTG          | 28.9                                                | 18.8         | 1              | 1            |
| 13       | Y          | TAT        | TAC          | 37.4                                                | 37.4         | 0.5            | 1            |
| 13       | S          | TCT        | TCC          | 33.9                                                | 33.9         | 0.5            | 0            |
| 13       | T          | ACG        | ACA          | 18.6                                                | 8.5          | 0.5            | 1            |
| 13       | I          | ATC        | ATC          | 14.6                                                | 6.1          | 1              | 1            |
| 14       | A          | GCG        | GCA          | 37.4                                                | 37.4         | 0.7            | 0            |
| 14       | G          | GGG        | GGA          | 14.3                                                | 8.2          | 1              | 1            |

<sup>a</sup>Codon usage estimated for *Escherichia coli*

It is found that only 50% of inactive singletons from the multi-mutants library can be explained by codon usage differences. The p-values for the grid of comparisons do not support codon usage predicting activities of singletons in the multi-mutant library ( $p > 0.1$ ).

## Supplemental References

- Lai PK, Kaznessis YN. 2017. Free Energy Calculations of Microcin J25 Variants Binding to the FhuA Receptor. *J. Chem. Theory Comput.* **13**:3413–3423.
- Nakamura Y, Gojobori T, Ikemura T. 1999. Codon usage tabulated from the international DNA sequence databases; its status 1999. *Nucleic Acids Res.* **27**:292.
- Pan SJ, Cheung WL, Link AJ. 2010. Engineered gene clusters for the production of the antimicrobial peptide microcin J25. *Protein Expr. Purif.* **71**:200–206.
- Wilson K-A, Kalkum M, Ottesen J, Yuzenkova J, Chait BT, Landick R, Muir T, Severinov K, Darst SA. 2003. Structure of microcin J25, a peptide inhibitor of bacterial RNA polymerase, is a lassoed tail. *J. Am. Chem. Soc.* **125**:12475–12483.
